# Supplementary material
Source: publisher site journal article supplement (https://www.dovepress.com/article/238973)
Supplement: Supplementary file 1 [file get_supplementary_file.php]

**Supplementary Table1. Primers used in RT-PCR analysis**

| Gene | Primer Sequence |
| --- | --- |
| ACAT2 (mouse) | 5’-CCCGTGGTCATCGTCTCAG-3’ |
|  | 5’-GGACAGGGCACCATTGAAGG-3’ |
| ACAT2 (human) | 5’-GCGGACCATCATAGGTTCCTT-3’ |
|  | 5’-ACTGGCTTGTCTAACAGGATTCT-3’ |
| GAPDH (mouse) | 5’-TGACCTCAACTACATGGTCTACA-3’ |
|  | 5’-CTTCCCATTCTCGGCCTTG-3’ |
| GAPDH (human) | 5’-GGAGCGAGATCCCTCCAAAAT-3’ |
|  | 5’-GGCTGTTGTCATACTTCTCATGG-3’ |
| Ki67 (mouse) | 5’-ATCATTGACCGCTCCTTTAGGT-3’ |
|  | 5’-GCTCGCCTTGATGGTTCCT-3’ |
| Ki67 (human) | 5’-ACGCCTGGTTACTATCAAAAGG-3’ |
|  | 5’-CAGACCCATTTACTTGTGTTGGA-3’ |
